# Supplementary material for: RhoGDI2 promotes epithelial-mesenchymal transition via induction of Snail in gastric cancer cells
Source: PubMed Central journal article supplement (PMC4039231; doi:10.18632/oncotarget.1733), 2014-02-07
Supplement: oncotarget-05-1554-s001.pdf [file oncotarget-05-1554-s001.pdf]

## RhoGDI2 promotes epithelial-mesenchymal transition via induction of Snail in gastric cancer cells – Cho et al

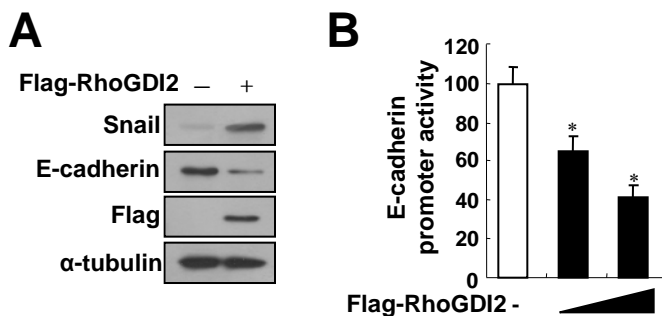

**Supplementary Figure 1. RhoGDI2 increases Snail expression and decreases E-cadherin expression.** (A) HEK293T cells were transiently transfected with RhoGDI2-expressing plasmid (Flag-RhoGDI2) or control plasmid (pCMVTag2B) and immunoblotted with indicated antibodies. (B) Effect of RhoGDI2 on E-cadherin promoter activity in HEK293T cells. Data are mean  $\pm$  SD of three individual experiments, each in triplicate. \*,  $P < 0.01$  as determined by paired Student  $t$  test.

# Supplementary Table 1

**Supplementary Table 1. Primer sequences used for RT-PCR analyses**

| Name of Gene   | Direction | Nucleotide sequences         |
|----------------|-----------|------------------------------|
| E-cadherin     | Sense     | 5'-CGAGTCCCCTAGTCGTCCT-3'    |
|                | Antisense | 5'-TGATTCTGCTGCTCTTGCTG-3'   |
| Snail          | Sense     | 5'-TGCAGTATTTGCAGTTGAAG-3'   |
|                | Antisense | 5'-CAGAGTTTACCTTCCAGCAG-3'   |
| Twist          | Sense     | 5'-AGCTTGCCATCTTGGAGT-3'     |
|                | Antisense | 5'-TACGAGGAGCTGCAGACG-3'     |
| Slug           | Sense     | 5'-CCCCAAAGATGAGGAGTATC-3'   |
|                | Antisense | 5'-CAAACACTACAGCGAACTGGAC-3' |
| $\beta$ -actin | Sense     | 5'-CCAGATCATGTTTGAGACCT-3'   |
|                | Antisense | 5'-TTGAAGGTAGTTTCGTGGAT-3'   |
